# Supplementary material for: The Epichloë festucae antifungal protein has activity against the plant pathogen Sclerotinia homoeocarpa, the causal agent of dollar spot disease
Source: PubMed Central journal article supplement (PMC5514056; doi:10.1038/s41598-017-06068-4), 2017-07-17
Supplement: 41598_2017_6068_MOESM1_ESM.pdf [file 41598_2017_6068_MOESM1_ESM.pdf]

Supplementary Information

The *Epichloë festucae* antifungal protein has activity against the plant pathogen  
*Sclerotinia homoeocarpa*, the causal agent of dollar spot disease

Zipeng Tian<sup>1</sup>, Ruying Wang<sup>1</sup>, Karen V. Ambrose<sup>1,2</sup>, Bruce B. Clarke<sup>1</sup>, Faith C. Belanger<sup>1\*</sup>

<sup>1</sup> Department of Plant Biology, Rutgers University, New Brunswick, New Jersey 08901,

<sup>2</sup> Current address: Indigo Agriculture, Charlestown, Massachusetts 02129

Supplementary Fig. S1. The single most parsimonious phylogenetic tree from an exhaustive search of the antifungal protein amino acid sequences shown in Fig. 2. The tree is midpoint rooted. The tree was based upon 101 total characters, of which 26 were constant, 56 variable characters were parsimony uninformative, and 19 variable characters were parsimony informative. NCBI accession numbers for the sequences are *Efe-AfpA* from *E. festucae*, SRR493691.12929; PAF from *P. chrysogenum*, U22944.2; PgAFP from *P. chrysogenum*, D0EXD3.1; NFAP from *N. fischeri*, AM983570, and AFP from *A. giganteus*, accession X60771.

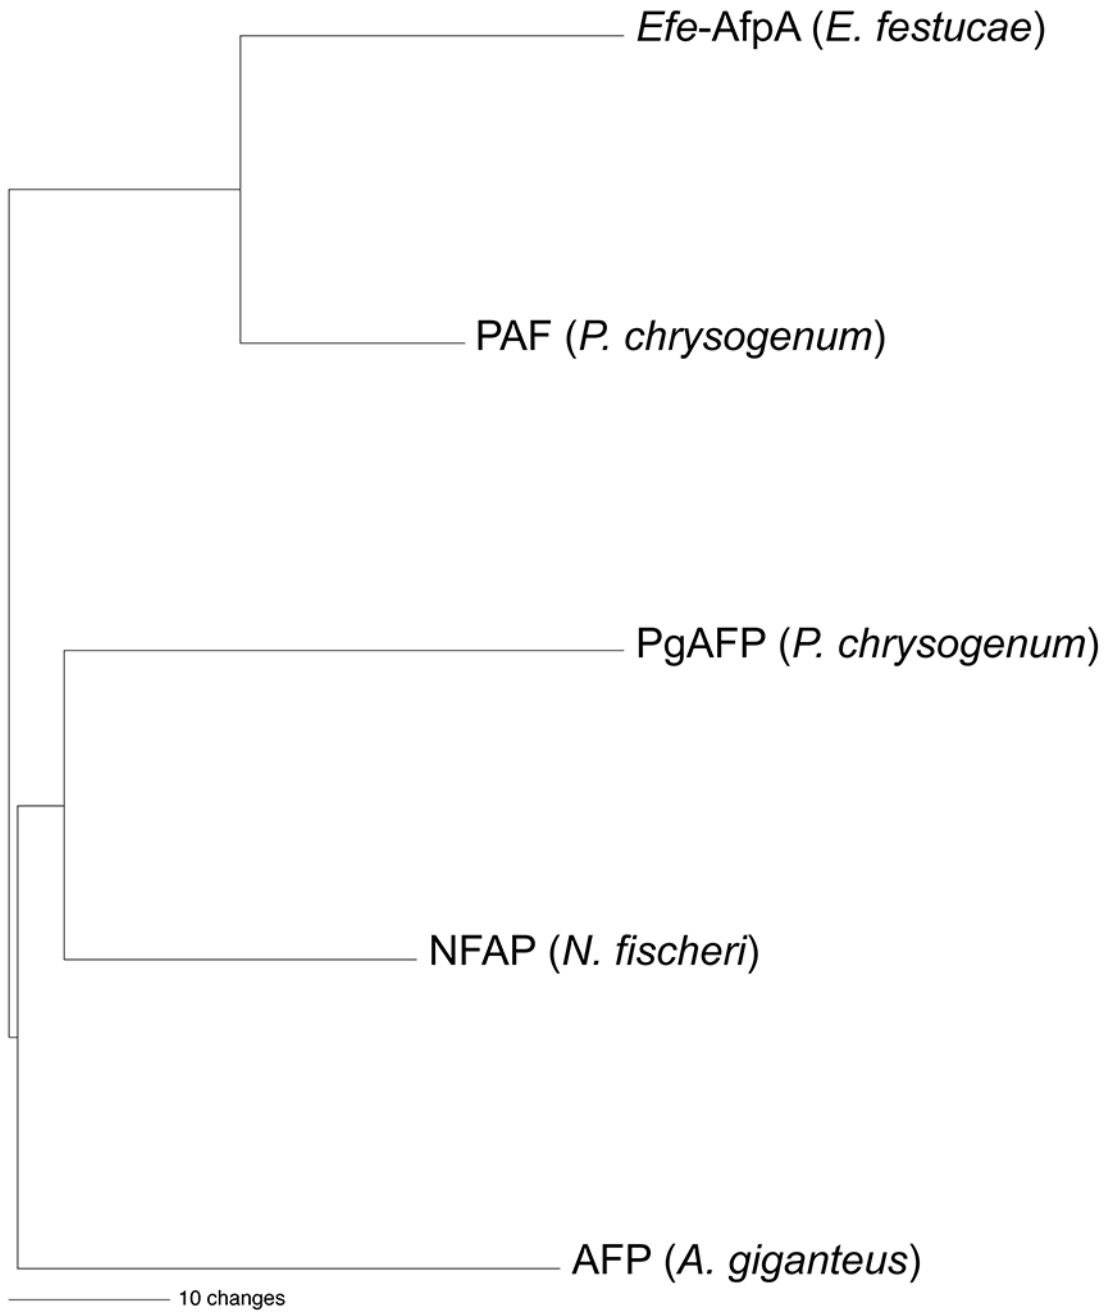

Supplementary Fig. S2. DNA sequence alignment of the antifungal protein gene sequences used for the phylogentic analysis presented in Figure 8. The coding sequences are in upper case and the intron sequences are in lower case. Asterisks indicate regions of identity.

|                           |                     |                                               |
|---------------------------|---------------------|-----------------------------------------------|
| <i>E. festucae</i>        | ATGCAAATCACCGTGGTGC | GGTTTTTCCTCCTCTCTGCAATGGGCGGAGT               |
| <i>E. baconii</i>         | ATGCAAATCACCGTAGTC  | GGTTTTTCCTCCTCTCTGCAATAGGCGGAGC               |
| <i>E. aotearoae</i>       | ATGCAAATCACCGTAGTC  | GGTTTTTCCTCCTCTCTGCAATAGGCGGAGC               |
| <i>E. inebrians</i>       | ATGCAGATCACCGCAGTT  | GGCCTTTTTCTCTCGCTGCAATGGGCGTGGT               |
| <i>Po. chlamydosporia</i> | ATGCAGATCA---       | TAATTGGCCTTTTTCTTTGCGCTGCGATGGGCGTGGT         |
| <i>Pe. chrysogenum</i>    | ATGCAAATCACACAGTT   | GCCCTTTTTCTCTCGCTGCAATGGGCGGGGT               |
| <i>B. bassiana</i>        | ATGCAGATTATTTCCAT   | CGCACTCTCTCTCCTCGCTGCGACCGGCGCCGT             |
| <i>C. brongniartii</i>    | ATGCAAATTATTTCCAT   | CGCCCTCTTTCTCCTCACTGCGACCGGCGCCGT             |
|                           | *****               | * * * * * * * * * *                           |
| <i>E. festucae</i>        | AGCCACACC---        | CATCAACTCCAGAATCAATCCTGTTGATGCCAGGGCGG        |
| <i>E. baconii</i>         | AGCCACACC---        | CATTAACTCCAGAATCAATCATGTTGATGCCAAAGCGG        |
| <i>E. aotearoae</i>       | AGCCACACC---        | CATTAACTCCGGAATCAATCATGTTGATGCCAAAGCGG        |
| <i>E. inebrians</i>       | AGCCACCCCAATTATT    | GAGTCCGAATCCAACGGCCTCGATGCTAGAGATG            |
| <i>Po. chlamydosporia</i> | AGCCACCCC---        | TATTAATTTCCAGTCCAACGGCCTCGATGCTAGAGATG        |
| <i>Pe. chrysogenum</i>    | AGCCACCCC---        | CATTGAGTCTGTATCAAACGACCTCGATGCCAGGGCTG        |
| <i>B. bassiana</i>        | CGCCGCCGC-----      | -----CACCCCTGAGCAGTTTGAGGCCAGAGATG            |
| <i>C. brongniartii</i>    | CGCCGCCGC-----      | -----CACCCCTGAGCAGTTTGAGGCCAGAGATG            |
|                           | *** * *             | * * * * * * * * *                             |
| <i>E. festucae</i>        | AGACTGGCATTCTGATC   | ACGTATGAAGGA gtgagttgat-tttgtgtcac            |
| <i>E. baconii</i>         | AGACTGGCGTTCTGATC   | ACGTATACAGGA gtgagtcaat-tttgtgttac            |
| <i>E. aotearoae</i>       | AGACTGGCGTTCTGATC   | ACGTATATAGGA gtgagtcaat-tttgtgttac            |
| <i>E. inebrians</i>       | AGGCTGGCATCCTTATC   | ACTTACTGGGGA gtgagtaaacatcaacattcc            |
| <i>Po. chlamydosporia</i> | AGGCTGGCATCCTTATC   | ACTTACTGGGGA gtgagtaaacataaacattcc            |
| <i>Pe. chrysogenum</i>    | AGGCCGGTGTCTGGCC    | AAATACACCGGA gtgagtaaacatcaatatccc            |
| <i>B. bassiana</i>        | GGGCCGGCGCCATGAT    | CAAGTACCACGGA gtaagcaag-----ataccgc           |
| <i>C. brongniartii</i>    | GGGCCAGCGCCATGAT    | CAAGTACCACGGA gtgagcaag-----aaaccgc           |
|                           | * * *               | * * * * * * * * *                             |
| <i>E. festucae</i>        | aatacc-----         | cgattactctgagtattcaa-taacca-cggagtcccctc      |
| <i>E. baconii</i>         | aatacc-----         | ctattactctaattcttcaa-taacca-cggaatcccctc      |
| <i>E. aotearoae</i>       | aatacc-----         | ctattactctaattactcaa-taacca-cggaatcccctc      |
| <i>E. inebrians</i>       | -atacc              | ttgggtactcacttgggaattaccgctaaccacttggaaacctc  |
| <i>Po. chlamydosporia</i> | -gtacc              | taggtgtcacttaggagttacagctaaccacttggaaacctc    |
| <i>Pe. chrysogenum</i>    | -atacc              | ttaagtactcacttgggaatcgcgactaacggttcgggaccacaa |
| <i>B. bassiana</i>        | -caatcc---          | atgttcactacggag-caaagctaacca-tccactcaactt     |
| <i>C. brongniartii</i>    | -caatcc---          | atgttcactacggag-caaagctaacca-tcgaatcacgtt     |
|                           | * *                 | * * * * * * * *                               |
| <i>E. festucae</i>        | tataaag             | ACATGTTCTAGAGCCAAAAACGAATGCAAGTACAAAAATCAGA   |
| <i>E. baconii</i>         | tataaag             | ACATGTACTAGAGACAAAAACGAATGCAAGTACAAAAATCAGA   |
| <i>E. aotearoae</i>       | tataaag             | ACATGTACTAGAGCCAAAAACGAATGCAAGTACAAAAATCAGA   |
| <i>E. inebrians</i>       | tccttag             | ACATGTACCCAAAAGACGAATGTATGCAAATACAAAAACCAA    |
| <i>Po. chlamydosporia</i> | --cttag             | ACATGTACCCAAAACAAAAATGAATGCAAATACAAAAACCAA    |
| <i>Pe. chrysogenum</i>    | --ctcag             | AAATGCACCAAAATCTAAGAACGAATGTAAATACAAGAACGATG  |
| <i>B. bassiana</i>        | --caaag             | ATTTGCACCAAGGCCAAGAACGAATGCAAGTTCAAGGGCCAGA   |
| <i>C. brongniartii</i>    | --caaag             | ATTTGCACCAAGGCTAAGAACGAATGCAAGTTCAAGGGCCAGA   |
|                           | ** * ** *           | * * * * * * * * *                             |
| <i>E. festucae</i>        | ACAACAAGGACACGTT    | CGTCAAGTGCCCGTCGTTGCAAAACAAGAAG gta           |
| <i>E. baconii</i>         | ACAATAAGAACACGTT    | CGTCAAGTGCCCGTCGTTGCAAAACAAGAAG gta           |
| <i>E. aotearoae</i>       | ACAATAAGGATACGTT    | CGTCAAGTGCCCTTCGTTTGCAAACAAGAAG gta           |
| <i>E. inebrians</i>       | ACAACAAGACACTTTT    | TGTCAGTGCCCTTTTTTCAATAATAAGAGG gta            |

*Po. chlamydosporia* ACAACGGGAACCTCTTTTGTCAAGTGCCCTTTGTTTCGATAACAAGAAG gta  
*Pe. chrysogenum* CTGGAAAGGACACTTTTATCAAGTGCCCCAAGTTTGATAACAAGAAG gta  
*B. bassiana* ATGGCAGGGATACCTTTGTCAAGTGCCCCAAGTTTGCCAACAAGAGG gta  
*C. brongniartii* ACGGCAAGGATACCTTTGTCAAGTGCCCCAAGTTTGCCAACAAGAGG gta

\* \* \* \* \* \*\*\*\*\* \*\* \*\* \* \* \* \* \*

*E. festucae* aaggttcttttttgcccccttttgaggct--gcctattttccaagcttacg  
*E. baconii* aaggttcttttttaccctcttttcaggct--gcttattttccaagcttacg  
*E. aotearoae* aaggttcttttttaccctcttttcaggct--gcttattttccaagcttacg  
*E. inebrians* aagttccatttaaccccccaagtagccaccaggttgccaccgtgctaac  
*Po. chlamydosporia* aaatctcatt-agtccctaagtagccacctgggttgactcgtgtaatg  
*Pe. chrysogenum* gaatatcaat-cattcgggaagtagccatctgaatcgatttcgtgctaac  
*B. bassiana* cg----tatttctccctcgacaagccgct--aattgtgtagatgctgact  
*C. brongniartii* cg----tatttctccctcgacaagctgct--aattgtttagatgctgact

\* \* \* \* \* \* \* \* \* \* \* \* \* \* \* \* \* \* \* \* \*

*E. festucae2368* tctgattaatccaccgttacag TGCACCAAAGACAACGCCAAGTGTAGCT  
*E. baconii* tctgtttaatccaccgttacag TGCACCAAAGACAAGCCAAGTGTACCT  
*E. aotearoae* cgttttttaatcatcgttacag TGCACCAGAGACGGCGCAAGTGTACCT  
*E. inebrians* tcgctctgttc---ttttccag TGCACCGGGGATGGCAAGTCGTGTAAAT  
*Po. chlamydosporia* tcgctctgttt---tttgtccag TGCACCGGGGATGGCAAGTCGTGTAAAT  
*Pe. chrysogenum* tcgctct-----ttttccag TGCACCAAGGATAATAACAAATGTACCG  
*B. bassiana* gc-----tttcttttag TGCACCAAGGACTACAACGAATGTTTCAT  
*C. brongniartii* gc-----tttcttttag TGCACCAAGGACCACAACGAATGTTTCGT

\* \* \* \* \* \*\*\*\*\* \*\* \* \* \* \* \*

*E. festucae* TTGACAGTTATCTCGAGCTGTCACGTGTCATTAG  
*E. baconii* TTGACAGTGTACTCGAGGTGTCACGTGTGATTAG  
*E. aotearoae* TTGACAGTGTCTCGAGGTGTCACGTGTGATTAG  
*E. inebrians* TCGACAGCTACGACCGAGCAGTTACGTGTTACTAG  
*Po. chlamydosporia* TCGACAGCGTCAACCGAGCAGTTACGTGTTACTAG  
*Pe. chrysogenum* TCGACACCTACAACAACGCTGTCGATTGTGACTAG  
*B. bassiana* ATGACAGCGTCAGCCGAGCTGTCGTGTGCCACTAG  
*C. brongniartii* ACGACAGCGTCAACCGAGCTGTCGTGTGCCACTAG

\*\*\*\* \* \* \* \* \* \* \* \* \* \* \* \* \* \* \*
